# Supplementary material for: The identification and functional analysis of CD8+PD-1+CD161+ T cells in hepatocellular carcinoma
Source: PubMed Central journal article supplement (PMC7599220; doi:10.1038/s41698-020-00133-4), 2020-10-30
Supplement: 41698_2020_133_MOESM1_ESM.pdf [file 41698_2020_133_MOESM1_ESM.pdf]

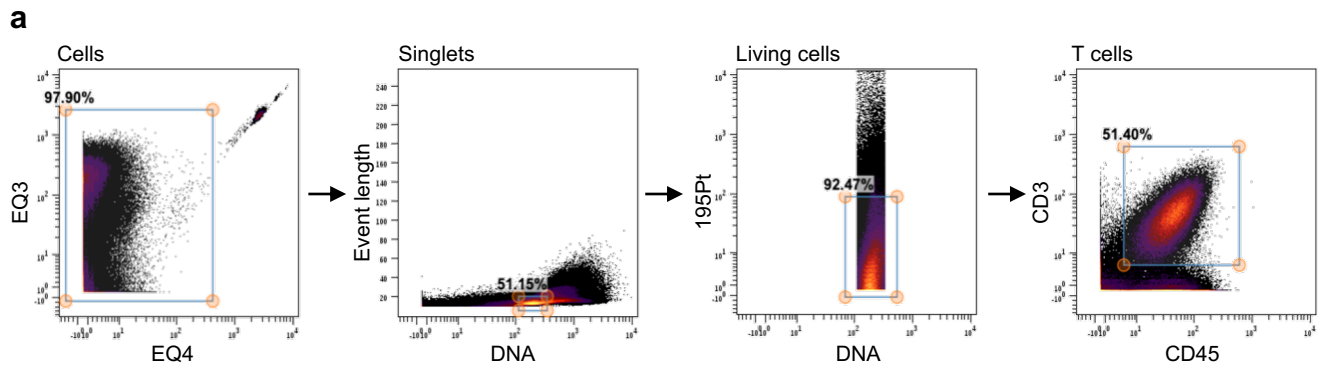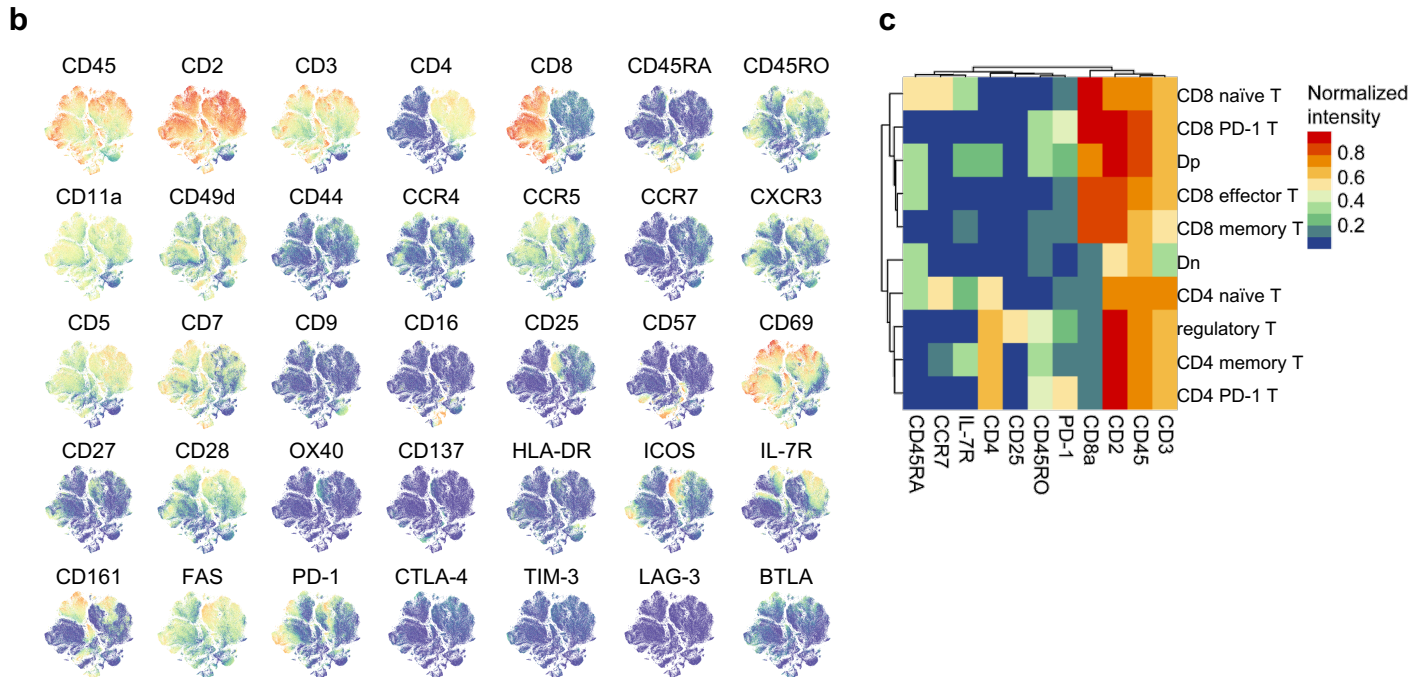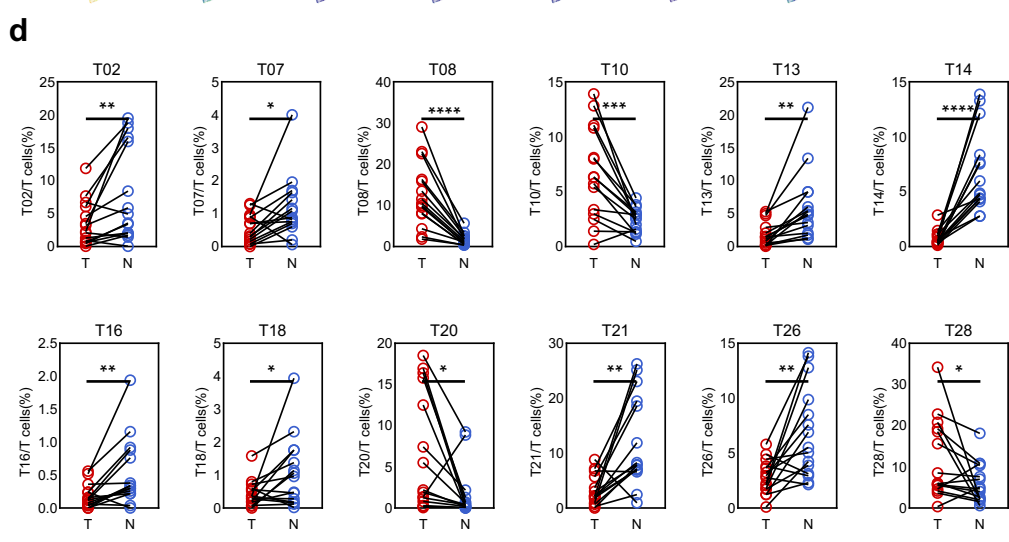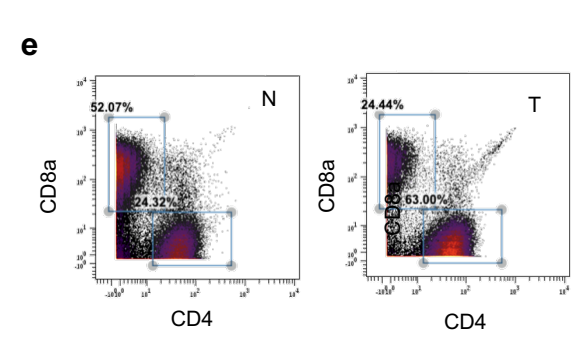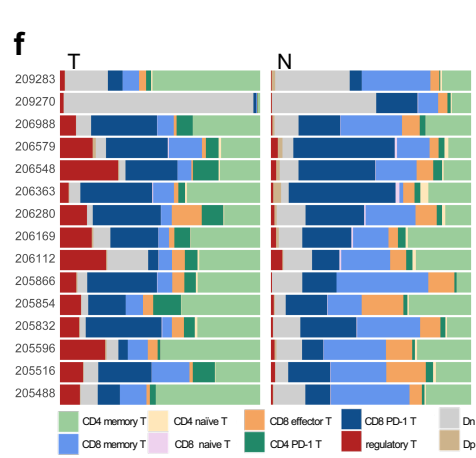

**Supplementary Fig. 1** (a) Gating T cell subsets on Cytobank. (b) tSNE plot of 35 markers. (c) Characteristic markers heat map of 10 annotation subpopulations (d) Significant differential enrichment in T and N regions (\*,  $p < 0.05$ , \*\*,  $p < 0.01$ , \*\*\*,  $p < 0.001$ , \*\*\*\*,  $p < 0.0001$ ). (e) Proportion differences of CD4<sup>+</sup>/CD8<sup>+</sup> T cells in T and N regions. (f) Immune cells composition in T and N. (T: left, N: right).

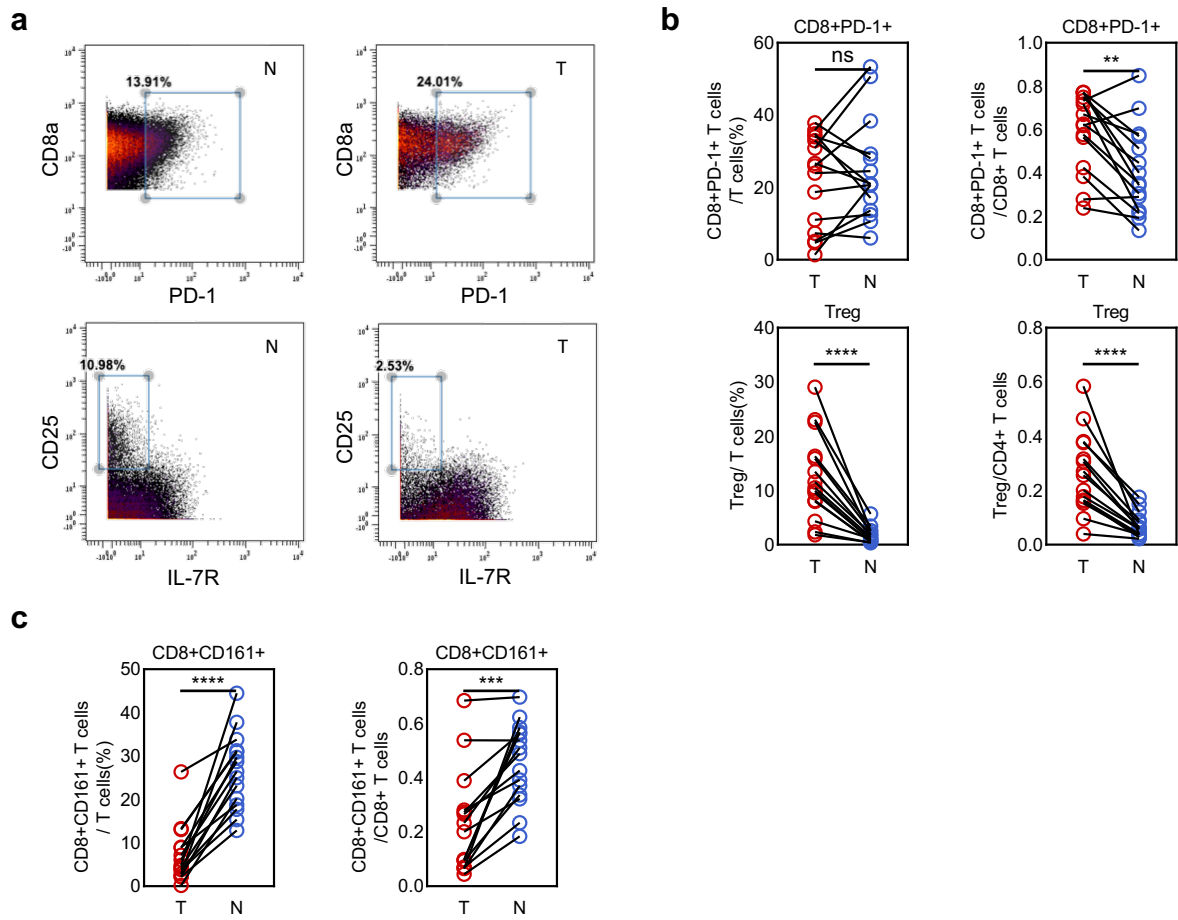

**Supplementary Fig. 2** (a, b) Distribution difference of CD8+PD-1+ T cells and Treg.

(c) Distribution differences of CD8+CD161+ T cells.

**a**

|              |   | PD-1+  |        |            | PD-1-  |        |            | CD161+ |       |            | CD161- |       |            |
|--------------|---|--------|--------|------------|--------|--------|------------|--------|-------|------------|--------|-------|------------|
|              |   | CD161- | CD161+ | Foldchange | CD161- | CD161+ | Foldchange | PD-1-  | PD-1+ | Foldchange | PD-1-  | PD-1+ | Foldchange |
| IFN $\gamma$ | N | 13675  | 16016  | 1.17       | 11551  | 13724  | 1.19       | 13724  | 16016 | 1.17       | 11551  | 13675 | 1.18       |
|              | T | 4015   | 3388   | 0.84       | 5473   | 7957   | 1.45       | 7957   | 3388  | 0.43       | 5473   | 4015  | 0.73       |
| TNF $\alpha$ | N | 1313   | 2027   | 1.54       | 1114   | 1355   | 1.22       | 1355   | 2027  | 1.50       | 1114   | 1313  | 1.18       |
|              | T | 1095   | 1371   | 1.25       | 1947   | 2458   | 1.26       | 2458   | 1371  | 0.56       | 1947   | 1095  | 0.56       |
| IL-2         | N | 1238   | 1507   | 1.22       | 1363   | 1174   | 0.86       | 1174   | 1507  | 1.28       | 1363   | 1238  | 0.91       |
|              | T | 987    | 1616   | 1.64       | 1445   | 1563   | 1.08       | 1563   | 1616  | 1.03       | 1445   | 987   | 0.68       |
| GNLY         | N | 49.1   | 57.1   | 1.16       | 79.3   | 54.4   | 0.69       | 54.4   | 57.1  | 1.05       | 79.3   | 49.1  | 0.62       |
|              | T | 40.6   | 39.9   | 0.98       | 75.2   | 42.1   | 0.56       | 42.1   | 39.9  | 0.95       | 75.2   | 40.6  | 0.54       |
| PRF          | N | 48.7   | 66.4   | 1.36       | 68     | 75.6   | 1.11       | 75.6   | 66.4  | 0.88       | 68     | 48.7  | 0.72       |
|              | T | 67     | 108    | 1.61       | 67     | 61.4   | 0.92       | 61.4   | 108   | 1.76       | 67     | 67    | 1.00       |
| GZMB         | N | 584    | 600    | 1.03       | 556    | 516    | 0.93       | 516    | 600   | 1.16       | 556    | 584   | 1.05       |
|              | T | 962    | 285    | 0.30       | 603    | 310    | 0.51       | 310    | 285   | 0.92       | 603    | 962   | 1.60       |

**Supplementary Fig. 3 (a)** IL-2, PRF, GZMB and TNF- $\alpha$  secretion level.

**a**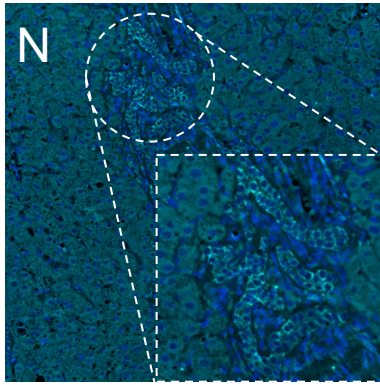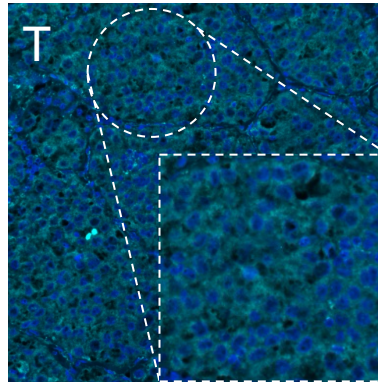

CD161 Stained by Opal520 dye

**b**

Cancer tissues displayed weak to moderate cytoplasmic positivity to CD161. Lymphomas were generally negative.

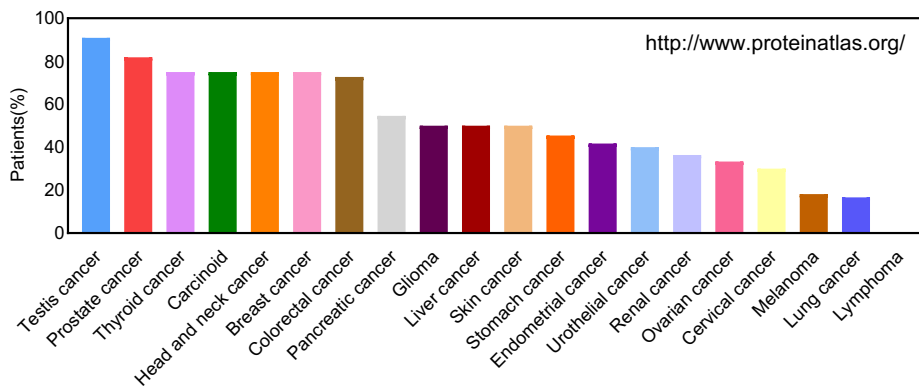**c**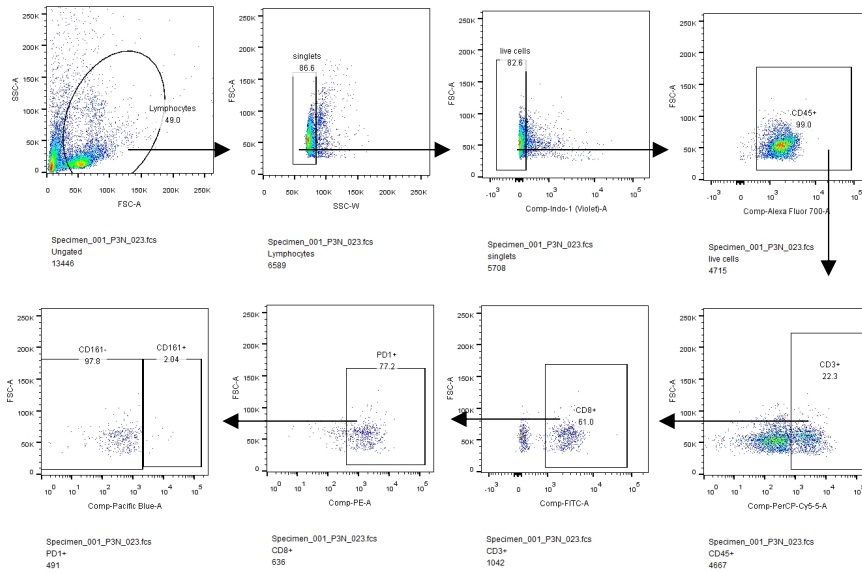

**Supplementary Fig. 4** (a, b) Moderate CD161 expression in hepatocytes (some data from the protein atlas database). (c) Flow cytometry gating strategy.



**a**

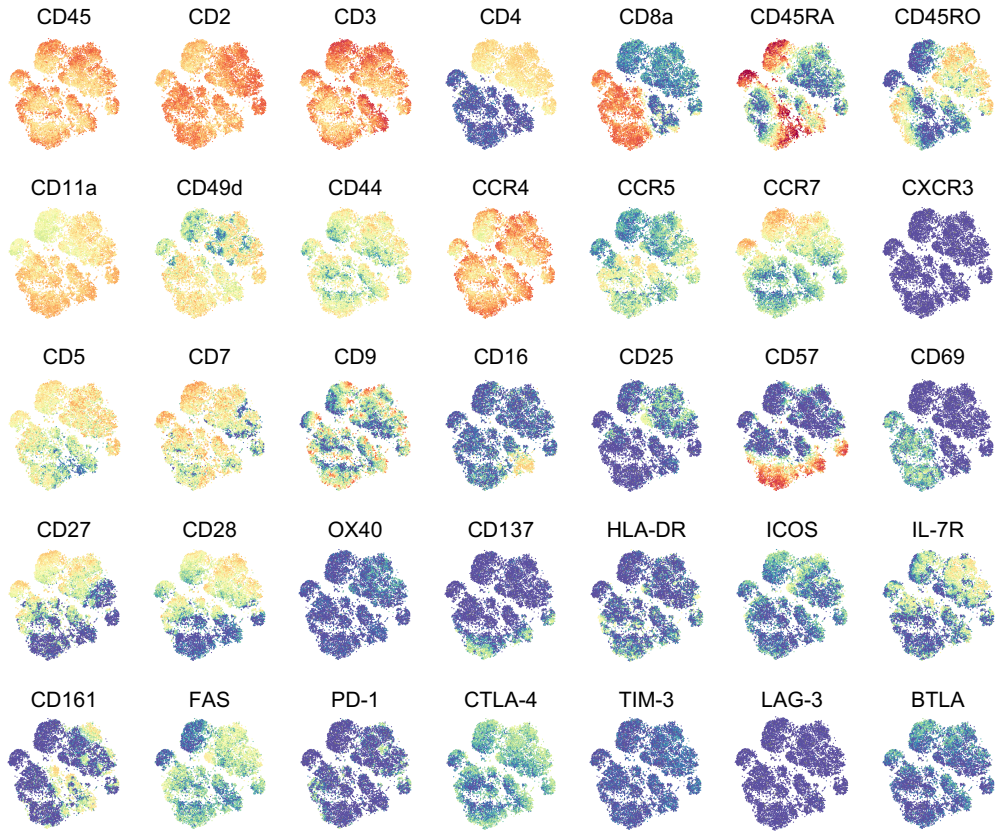

**Supplementary Fig. 5(a)** tSNE plot of 35 markers.

Supplementary Table 1. Clinical Characteristics Of 20 HCC Patients

| No. | Patient ID | Viral status | Grades | Sex | Race  | Age | Tumor size(cm) | Tumor multiplicity | AFP level(ng/ml) | Sample type |
|-----|------------|--------------|--------|-----|-------|-----|----------------|--------------------|------------------|-------------|
| 1   | 209270     | Hep B        | III    | M   | China | 46  | 4.6            | 1                  | 4.8              | Tissue      |
| 2   | 209283     | Hep B        | III    | M   | China | 54  | 6.4            | 1                  | 69.18            | Tissue      |
| 3   | 205596     | N            | IV     | M   | China | 55  | 9.9            | 2                  | 11199            | Tissue      |
| 4   | 205488     | Hep B        | III    | M   | China | 50  | 7.3            | 1                  | 3.6              | Tissue      |
| 5   | 205516     | N            | III    | M   | China | 69  | 3              | 1                  | 169              | Tissue      |
| 6   | 205832     | N            | III    | M   | China | 66  | 7.2            | 1                  | 9.9              | Tissue      |
| 7   | 205854     | Hep B        | III    | F   | China | 65  | 5.5            | 1                  | 34.2             | Tissue      |
| 8   | 205866     | Hep B        | III    | F   | China | 71  | 3.2            | 1                  | 9.9              | Tissue      |
| 9   | 206112     | Hep B        | III    | M   | China | 61  | 4              | 1                  | 1210             | Tissue      |
| 10  | 206169     | Hep B        | III    | M   | China | 53  | 6.6            | 2                  | 2.7              | Tissue      |
| 11  | 206280     | Hep B        | III    | M   | China | 70  | 4.8            | 1                  | 91.8             | Tissue      |
| 12  | 206988     | Hep B        | III    | F   | China | 63  | 1.5            | 1                  | 27.7             | Tissue      |
| 13  | 206363     | Hep B        | III    | M   | China | 56  | 10             | 3                  | 2.7              | Tissue      |
| 14  | 206548     | Hep B        | III    | F   | China | 62  | 13.3           | 1                  | 55840            | Tissue      |
| 15  | 206579     | Hep B        | III    | M   | China | 40  | 10             | 3                  | 2989             | Tissue      |
| 16  | 208041     | N            | III    | F   | China | 70  | 5.5            | 1                  | 210.2            | Blood       |
| 17  | 208143     | Hep B        | III    | M   | China | 47  | 8              | 3                  | 170.9            | Blood       |
| 18  | 208149     | Hep B        | III    | M   | China | 37  | 8.9            | 1                  | 299.3            | Blood       |
| 19  | 208188     | N            | III    | M   | China | 65  | 10             | 3                  | >1000            | Blood       |
| 20  | 208336     | Hep B        | III    | M   | China | 68  | 9              | 1                  | 8                | Blood       |

Supplementary Table 2. Chemical Reagents Used In CyTOF And Analysis-related Software/Algorithm

| Reagent name                                         | Isotopes                                                                                                                                                                                | Identifier    | Source          |
|------------------------------------------------------|-----------------------------------------------------------------------------------------------------------------------------------------------------------------------------------------|---------------|-----------------|
| <b>Antibodies</b>                                    |                                                                                                                                                                                         |               |                 |
| CD45                                                 | Y89                                                                                                                                                                                     | Cat# 3089003B | Fluidigm        |
| CD45RA                                               | 169Tm                                                                                                                                                                                   | Cat# 3169008B | Fluidigm        |
| CD45RO                                               | 165Ho                                                                                                                                                                                   | Cat# 3165011B | Fluidigm        |
| CD49d                                                | 141Pr                                                                                                                                                                                   | Cat# 3141004B | Fluidigm        |
| CD5                                                  | 143Nd                                                                                                                                                                                   | Cat# 3143007B | Fluidigm        |
| CD57                                                 | 172Yb                                                                                                                                                                                   | Cat# 3172009B | Fluidigm        |
| CD69                                                 | 162Dy                                                                                                                                                                                   | Cat# 3162001B | Fluidigm        |
| CD7                                                  | 147Sm                                                                                                                                                                                   | Cat# 3147006B | Fluidigm        |
| CD8a                                                 | 146Nd                                                                                                                                                                                   | Cat# 3146001B | Fluidigm        |
| CD9                                                  | 171Yb                                                                                                                                                                                   | Cat# 3171009B | Fluidigm        |
| CD95                                                 | 152Sm                                                                                                                                                                                   | Cat# 3152017B | Fluidigm        |
| HLA-DR                                               | 174Yb                                                                                                                                                                                   | Cat# 3174001B | Fluidigm        |
| Tim-3                                                | 153Eu                                                                                                                                                                                   | Cat# 3153008B | Fluidigm        |
| CD278                                                | 168Er                                                                                                                                                                                   | Cat# 3168024B | Fluidigm        |
| CD11a                                                | 142Nd                                                                                                                                                                                   | Cat# 3142006B | Fluidigm        |
| CD127                                                | 176Yb                                                                                                                                                                                   | Cat# 3176004B | Fluidigm        |
| CD134                                                | 150Nd                                                                                                                                                                                   | Cat# 3150023B | Fluidigm        |
| CD137                                                | 173Yb                                                                                                                                                                                   | Cat# 3173015B | Fluidigm        |
| CD152                                                | 161Dy                                                                                                                                                                                   | Cat# 3161004B | Fluidigm        |
| CD16                                                 | 209Bi                                                                                                                                                                                   | Cat# 3209002B | Fluidigm        |
| CD161                                                | 164Dy                                                                                                                                                                                   | Cat# 3164009B | Fluidigm        |
| CD183                                                | 156Gd                                                                                                                                                                                   | Cat# 3156004B | Fluidigm        |
| CD194                                                | 158Gd                                                                                                                                                                                   | Cat# 3158032A | Fluidigm        |
| CD195                                                | 144Nd                                                                                                                                                                                   | Cat# 3144007A | Fluidigm        |
| CD197                                                | 159Tb                                                                                                                                                                                   | Cat# 3159003A | Fluidigm        |
| CD2                                                  | 151Eu                                                                                                                                                                                   | Cat# 3151003B | Fluidigm        |
| CD223                                                | 175Lu                                                                                                                                                                                   | Cat# 3175033B | Fluidigm        |
| CD25                                                 | 149Sm                                                                                                                                                                                   | Cat# 3149010B | Fluidigm        |
| CD27                                                 | 167Er                                                                                                                                                                                   | Cat# 3167002B | Fluidigm        |
| CD272                                                | 163Dy                                                                                                                                                                                   | Cat# 3163009B | Fluidigm        |
| CD279                                                | 155Gd                                                                                                                                                                                   | Cat# 3155009B | Fluidigm        |
| CD28                                                 | 160Gd                                                                                                                                                                                   | Cat# 3160003B | Fluidigm        |
| CD3                                                  | 170Er                                                                                                                                                                                   | Cat# 3170001B | Fluidigm        |
| CD4                                                  | 145Nd                                                                                                                                                                                   | Cat# 3140005B | Fluidigm        |
| CD44                                                 | 166Er                                                                                                                                                                                   | Cat# 3166001B | Fluidigm        |
| <b>Chemicals, Peptides, and Recombinant Proteins</b> |                                                                                                                                                                                         |               |                 |
| Cisplatin                                            |                                                                                                                                                                                         | Cat# 201192A  | Fluidigm        |
| Iridium                                              |                                                                                                                                                                                         | #422302       | Fluidigm        |
| Human TruStain FcX™                                  |                                                                                                                                                                                         | #422302       | Biolegend       |
| <b>Software and Algorithms</b>                       |                                                                                                                                                                                         |               |                 |
| Cytobank                                             | <a href="https://support.cytobank.org/hc/en-us/articles/206336147-FCS-file-concatenation-tool">https://support.cytobank.org/hc/en-us/articles/206336147-FCS-file-concatenation-tool</a> |               |                 |
| Concatenation tool                                   |                                                                                                                                                                                         |               | Cytobank        |
| Cytofkit (tSNE, FlowSOM)                             | <a href="https://bioconductor.org/packages/release/bioc/html/destiny.html">https://bioconductor.org/packages/release/bioc/html/destiny.html</a>                                         |               | Chen et al. (1) |
| Diffusion map                                        |                                                                                                                                                                                         |               | Cytobank        |

1. Chen H, Lau MC, Wong MT, Newell EW, Poidinger M, Chen J. Cytofkit: A Bioconductor Package for an Integrated Mass Cytometry Data Analysis Pipeline. PLoS Comput Biol 2016;12:e1005112.



Supplementary Table 4. The abundance of 30 Clusters in tumor tissues

| Clusters | 20548SN | 205488T | 205516N | 205516T | 205596N | 205596T | 205832N | 205832T | 205854N | 205854T | 205866N | 205866T | 206112N | 206112T | 206169N | 206169T | 206280N | 206280T | 206363N | 206363T | 206548N | 206548T | 206579N | 206579T | 206988N | 206988T | 209270N | 209270T | 209283N | 209283T |
|----------|---------|---------|---------|---------|---------|---------|---------|---------|---------|---------|---------|---------|---------|---------|---------|---------|---------|---------|---------|---------|---------|---------|---------|---------|---------|---------|---------|---------|---------|---------|
| T01      | 0.78    | 0.38    | 0.76    | 0.64    | 4.46    | 0.22    | 3.82    | 0.32    | 0.1     | 0.28    | 0.86    | 0.74    | 0.28    | 0.04    | 0.56    | 0.18    | 0.48    | 2.72    | 0.08    | 0.14    | 1.84    | 0.14    | 4.42    | 1.44    | 2.02    | 0.5     | 0.14    | 0       | 0.1     | 0.06    |
| T02      | 16.54   | 7.68    | 18.76   | 11.86   | 17.96   | 6.06    | 19.5    | 2.26    | 8.42    | 4.58    | 15.96   | 3.48    | 3.4     | 0.7     | 3.36    | 0.48    | 2.06    | 1.3     | 0.06    | 0.92    | 5.88    | 3.22    | 4.94    | 6.7     | 1.46    | 2.08    | 1.72    | 0.06    | 2.02    | 0.62    |
| T03      | 1.46    | 1.04    | 5.9     | 1.14    | 4.76    | 4.54    | 5.78    | 5.46    | 7.5     | 3.92    | 0.88    | 5.08    | 3.08    | 5.3     | 1.88    | 1.98    | 4.32    | 5.58    | 1.26    | 1.94    | 0.54    | 0.28    | 1.48    | 0.9     | 1.12    | 0.18    | 0.46    | 0.1     | 0.1     | 0.62    |
| T04      | 6.76    | 8.04    | 17.56   | 19.8    | 8.68    | 3.52    | 26.34   | 17.68   | 11.5    | 11.48   | 10.8    | 18.54   | 8.74    | 2.5     | 12.04   | 8.06    | 10.66   | 9.16    | 15.82   | 16.92   | 22.1    | 6.52    | 27.42   | 19.66   | 12.06   | 8.06    | 12.04   | 0.52    | 2.3     | 4.3     |
| T05      | 2.02    | 1.4     | 1.16    | 4.44    | 0.72    | 0.66    | 0.74    | 1.52    | 1.44    | 1.46    | 2.76    | 1.06    | 0.98    | 0.1     | 4.66    | 2.18    | 19.78   | 1.02    | 0.74    | 0.3     | 0.68    | 1.82    | 0.08    | 1.14    | 0.4     | 4.58    | 0.24    | 0.36    | 8.94    | 0.2     |
| T06      | 0.36    | 0.92    | 0.32    | 1.06    | 0.38    | 0.34    | 0.12    | 0.46    | 0.82    | 1.08    | 0.22    | 1.96    | 0.52    | 0.1     | 3       | 3.8     | 6.26    | 1.04    | 0.26    | 0.1     | 0.56    | 0.44    | 0.74    | 0.4     | 0.16    | 3.26    | 0.14    | 0.2     | 1.76    | 0.34    |
| T07      | 0.7     | 0.08    | 1.42    | 0.28    | 1.08    | 0.22    | 0.82    | 1.3     | 0.76    | 0.16    | 0.06    | 0.92    | 1.7     | 0.88    | 1.16    | 0.32    | 1.64    | 0.4     | 4       | 0.96    | 0.76    | 0.7     | 1.96    | 1.26    | 0.2     | 0.08    | 0.6     | 0       | 0.88    | 0.7     |
| T08      | 0.94    | 9.94    | 2.04    | 11.56   | 1.8     | 22.56   | 0.96    | 9.58    | 1.42    | 10.48   | 0.52    | 8.14    | 5.68    | 23.06   | 2.54    | 15.88   | 1.72    | 13.48   | 1.12    | 4.32    | 2.6     | 29.06   | 3.44    | 16.32   | 0.72    | 7.98    | 0.44    | 1.8     | 0.36    | 2.36    |
| T09      | 0.02    | 0.16    | 0       | 0.04    | 0       | 0       | 0.04    | 0.06    | 0.06    | 0.06    | 0.02    | 0.02    | 0.08    | 0.02    | 0.08    | 0.36    | 0.32    | 7.94    | 0.02    | 0       | 0.08    | 0.32    | 0.24    | 0.24    | 0.2     | 0.94    | 0.12    | 0.02    | 0       | 0.04    |
| T10      | 1.28    | 2.98    | 3.62    | 11.04   | 1.34    | 1.4     | 2.5     | 5.4     | 2       | 13.9    | 1.14    | 5.74    | 3.14    | 6.3     | 3.8     | 7.98    | 2.62    | 10.8    | 2.9     | 3.36    | 4.42    | 12.82   | 2.92    | 6.34    | 2.94    | 8.1     | 1.58    | 0.2     | 0.48    | 2.48    |
| T11      | 0.22    | 0.38    | 0.16    | 0.62    | 0.12    | 0.32    | 0.04    | 0.44    | 0.14    | 0.16    | 0.04    | 0.9     | 0.04    | 0.04    | 2.34    | 4.72    | 1.34    | 0.06    | 15.02   | 12.4    | 0.02    | 0.16    | 0.2     | 0.2     | 0.24    | 0.32    | 0       | 0       | 0.02    | 0       |
| T12      | 6.82    | 14.38   | 2.58    | 3.26    | 2.28    | 8.34    | 2.42    | 3.78    | 9.64    | 15.9    | 1.6     | 3.26    | 8.76    | 20.64   | 5.3     | 7.62    | 3.18    | 9.18    | 10.6    | 17.76   | 7.54    | 6.64    | 3.8     | 5.16    | 9.5     | 4.38    | 3.28    | 0.22    | 6.18    | 12.14   |
| T13      | 4.9     | 1.42    | 2.04    | 1.44    | 1.28    | 0.18    | 1.12    | 0.54    | 8.3     | 5.3     | 6.02    | 0.82    | 1.74    | 0.26    | 4.7     | 1.54    | 5.42    | 2.04    | 13.38   | 4.7     | 5.32    | 0.18    | 21.12   | 4.98    | 3.2     | 1.14    | 8.28    | 0.06    | 3.66    | 2.92    |
| T14      | 4.72    | 0.5     | 13.86   | 0.52    | 8.36    | 0.38    | 4.32    | 0.5     | 13.28   | 1.12    | 12.14   | 0.96    | 4.86    | 1.12    | 2.78    | 0.36    | 5.98    | 1.46    | 4.4     | 0.28    | 7.68    | 0.2     | 2.78    | 0.84    | 7.54    | 0.3     | 4.1     | 0.12    | 4.36    | 2.86    |
| T15      | 0.6     | 1.02    | 1.1     | 2.6     | 0.46    | 0.36    | 0.28    | 2.84    | 0.36    | 0.56    | 0.22    | 2.08    | 2.7     | 0.4     | 3.24    | 2.2     | 2.6     | 4.24    | 0.28    | 0.5     | 9.64    | 3.3     | 1.28    | 0.5     | 4.58    | 6.46    | 0.1     | 0       | 0.04    | 0.06    |
| T16      | 0.34    | 0.04    | 0.26    | 0.12    | 0.22    | 0       | 0.38    | 0.36    | 0.3     | 0.04    | 0       | 0.24    | 0.92    | 0.24    | 0.88    | 0.14    | 0.76    | 0.12    | 1.94    | 0.52    | 0.3     | 0.08    | 1.16    | 0.56    | 0.22    | 0.16    | 0.34    | 0       | 0.04    | 0.06    |
| T17      | 1.3     | 0.08    | 0.02    | 0       | 0.08    | 0.02    | 0.22    | 0       | 0.08    | 0.08    | 0.02    | 0.02    | 0.32    | 0.02    | 0.64    | 0.14    | 0.14    | 0       | 0.06    | 0.16    | 0.08    | 0.02    | 0.26    | 0.48    | 1.66    | 0.1     | 0.06    | 0       | 0.14    | 0.12    |
| T18      | 0.28    | 0.3     | 0.16    | 0.28    | 0.96    | 0.72    | 0.18    | 0.36    | 0.48    | 0.18    | 0.02    | 0.6     | 0.46    | 0.56    | 1.38    | 0.8     | 1.14    | 0       | 3.94    | 0.36    | 1.76    | 0.52    | 2.32    | 1.58    | 1.06    | 0.06    | 0.12    | 0.08    | 1.76    | 0.2     |
| T19      | 0.92    | 0.64    | 2.24    | 0.66    | 0.5     | 0.6     | 1.18    | 1.9     | 2.16    | 1.4     | 0.36    | 2.22    | 1       | 1.86    | 0.64    | 0.58    | 0.38    | 0.68    | 0.2     | 0.44    | 0.62    | 0.42    | 0.42    | 0.12    | 0.74    | 0.12    | 0.16    | 0.02    | 0.24    | 1.96    |
| T20      | 0       | 0.2     | 0.14    | 2.2     | 0.06    | 0.3     | 0.26    | 16.4    | 0.4     | 1.24    | 0.04    | 12.5    | 0.42    | 1.9     | 2.18    | 7.42    | 9.24    | 18.52   | 8.86    | 1.36    | 1.28    | 15.8    | 0.64    | 5.52    | 0.72    | 16.96   | 0.22    | 0.8     | 0.02    | 0.06    |
| T21      | 18.58   | 3.7     | 7.06    | 1.84    | 7.88    | 3.04    | 7.16    | 0.7     | 6.92    | 2.2     | 26.26   | 2.1     | 19.46   | 5.7     | 8.28    | 2.22    | 2.46    | 0.28    | 0.94    | 8.82    | 11.88   | 1.66    | 6.58    | 6.76    | 25.14   | 0.94    | 7.78    | 0.02    | 23.04   | 7.18    |
| T22      | 0.12    | 0.1     | 0.08    | 0.02    | 0.2     | 0.04    | 0.26    | 0.12    | 0.14    | 0.1     | 0.16    | 0.34    | 0.48    | 0.04    | 0.94    | 0.58    | 1.76    | 0.2     | 0.06    | 0.02    | 0.22    | 0       | 0.46    | 0.06    | 0.56    | 0.5     | 36.62   | 3.26    | 6.4     | 3.68    |
| T23      | 0.06    | 0.9     | 0.04    | 1.28    | 0       | 0.44    | 0.04    | 0.1     | 0.06    | 0.16    | 0.1     | 0.12    | 0.22    | 0.08    | 0.8     | 0.34    | 1.56    | 0.02    | 0.02    | 0.06    | 0.12    | 0.42    | 0       | 0.36    | 0.16    | 1.56    | 0.86    | 89.88   | 6.56    | 0.46    |
| T24      | 12.84   | 32.86   | 8.72    | 12.88   | 22.66   | 37      | 6.12    | 4.86    | 11.66   | 13.54   | 4.58    | 7.16    | 7.02    | 3.28    | 7.48    | 3.52    | 2.32    | 2.18    | 0.2     | 2.7     | 2.86    | 6.94    | 2.46    | 8.52    | 1.44    | 9.78    | 1.08    | 0.48    | 5.94    | 5.48    |
| T25      | 0.02    | 0.02    | 0.08    | 0.02    | 0       | 0.02    | 0       | 0.02    | 0.06    | 0       | 0.02    | 0.08    | 0.04    | 0.02    | 0.04    | 0       | 0.9     | 0       | 0.18    | 0.34    | 0.32    | 0.02    | 0.02    | 0.02    | 0.04    | 0.38    | 0.86    | 0.44    | 0.06    | 0.06    |
| T26      | 13.82   | 5.8     | 5.04    | 4.44    | 8.5     | 3.64    | 12.78   | 2.06    | 3.88    | 1.72    | 14.14   | 2.24    | 7.58    | 2.94    | 5.52    | 3.24    | 2.3     | 1.24    | 3.12    | 4.88    | 6.9     | 1.24    | 2.94    | 3.82    | 9.88    | 1.78    | 4.24    | 0.1     | 2.14    | 2.76    |
| T27      | 0.08    | 0.16    | 0.08    | 0.02    | 0.06    | 0       | 0       | 0.12    | 0.04    | 0.12    | 0.02    | 0.06    | 0       | 0.3     | 0.16    | 0.48    | 0.04    | 0       | 0       | 0.04    | 0       | 0       | 0       | 0.02    | 0.18    | 0.2     | 5.32    | 0.26    | 3.96    | 2.78    |
| T28      | 2       | 4.14    | 4.02    | 5.5     | 1.54    | 3.64    | 2.28    | 20.82   | 7.6     | 8.52    | 0.58    | 18.54   | 10.8    | 4.62    | 18.14   | 23.82   | 7       | 5.92    | 10.34   | 15.64   | 2.7     | 6.04    | 4.66    | 5.68    | 10.82   | 19.26   | 5.08    | 0.36    | 2.14    | 34.2    |
| T29      | 0.02    | 0       | 0.04    | 0       | 0.04    | 0.1     | 0.12    | 0.04    | 0.1     | 0.06    | 0.02    | 0.04    | 0.1     | 0.02    | 0.72    | 0.22    | 0.94    | 0       | 0.16    | 0.02    | 0.06    | 0.02    | 0.24    | 0.12    | 0.16    | 0.04    | 4.16    | 0.18    | 13.92   | 5.9     |
| T30      | 1.5     | 0.74    | 0.74    | 0.44    | 3.62    | 1.34    | 0.22    | 0.12    | 0.3     | 0.28    | 0.34    | 0.08    | 5.42    | 17.26   | 0.42    | 0.16    | 0.24    | 0.38    | 0.04    | 0.08    | 1.2     | 1.02    | 1.02    | 0.3     | 0.92    | 0.14    | 0.34    | 0.04    | 2.06    | 5.4     |

Cell percentage(%)

Supplementary Table 5: the difference of gene expression between CDH1-CD161+ and CDH1-CD161-

| Gene         | Pvalue     | Log2(Abundance) | PCT   | PCT2  | AdjustedPvalue | CD161+ | CD161- |
|--------------|------------|-----------------|-------|-------|----------------|--------|--------|
| CCL3         | 4.16E-44   | 1.04814138      | 0.96  | 0.94  | 5.06E-40       | CD161+ | CD161- |
| GZMB         | 5.36E-35   | 1.17125253      | 0.94  | 0.93  | 6.53E-31       | CD161+ | CD161- |
| NG2          | 4.56E-33   | 1.0524195       | 0.99  | 0.98  | 5.48E-29       | CD161+ | CD161- |
| GZMA         | 1.49E-27   | 1.12512954      | 0.83  | 0.81  | 1.81E-23       | CD161+ | CD161- |
| HLA-DQB1     | 7.53E-26   | 1.13702064      | 0.85  | 0.81  | 9.18E-22       | CD161+ | CD161- |
| COTL1        | 3.78E-22   | 0.92643276      | 0.76  | 0.76  | 4.55E-18       | CD161+ | CD161- |
| CPTA         | 3.79E-21   | 0.71252071      | 0.99  | 0.98  | 7.98E-17       | CD161+ | CD161- |
| HLA-DRA      | 3.79E-21   | 1.45328369      | 0.72  | 0.72  | 7.98E-17       | CD161+ | CD161- |
| CD82         | 1.24E-17   | 0.87382472      | 0.97  | 0.97  | 1.51E-13       | CD161+ | CD161- |
| GZMH         | 1.31E-17   | 0.68481672      | 0.74  | 0.74  | 1.66E-13       | CD161+ | CD161- |
| ACTB         | 4.44E-17   | 1.00171713      | 0.96  | 0.97  | 5.41E-13       | CD161+ | CD161- |
| CXCL13       | 1.44E-13   | 1.04991587      | 0.80  | 0.80  | 1.78E-11       | CD161+ | CD161- |
| GAPDH        | 1.76E-14   | 1.41539998      | 0.89  | 0.89  | 2.07E-10       | CD161+ | CD161- |
| RPL12P01B1.2 | 4.42E-14   | 1.22290419      | 0.55  | 0.63  | 5.38E-10       | CD161+ | CD161- |
| MIR445-1HG   | 5.99E-14   | 0.99102627      | 0.21  | 0.09  | 7.30E-10       | CD161+ | CD161- |
| SREBF1       | 1.58E-13   | 0.43431704      | 0.93  | 0.88  | 1.92E-09       | CD161+ | CD161- |
| PP1J         | 1.54E-12   | 0.84690723      | 0.95  | 0.91  | 1.87E-08       | CD161+ | CD161- |
| HLA-DQB1     | 4.26E-12   | 0.68613044      | 0.49  | 0.19  | 5.11E-08       | CD161+ | CD161- |
| TRIT1        | 1.87E-11   | 0.93032079      | 0.29  | 0.67  | 2.27E-07       | CD161+ | CD161- |
| PPI1         | 3.20E-11   | 0.49091054      | 0.47  | 0.52  | 3.93E-07       | CD161+ | CD161- |
| GNLY         | 3.79E-11   | 1.84423644      | 0.28  | 0.88  | 4.61E-07       | CD161+ | CD161- |
| PARK7        | 1.27E-10   | 0.87295133      | 0.57  | 0.2   | 1.55E-06       | CD161+ | CD161- |
| HLA-DPB1     | 4.37E-10   | 0.77965467      | 0.57  | 0.23  | 5.51E-06       | CD161+ | CD161- |
| DUSP4        | 6.15E-10   | 0.89906029      | 0.73  | 0.76  | 7.49E-06       | CD161+ | CD161- |
| TRAF3IP1     | 7.14E-10   | 0.77965467      | 0.96  | 0.95  | 8.69E-06       | CD161+ | CD161- |
| HLA-DPA1     | 9.38E-10   | 0.52317896      | 0.66  | 0.33  | 1.14E-05       | CD161+ | CD161- |
| RAREX3       | 1.10E-09   | 0.89736666      | 0.66  | 0.67  | 1.34E-05       | CD161+ | CD161- |
| HLA-DQA2     | 1.14E-09   | 0.5620982       | 0.53  | 0.95  | 1.35E-05       | CD161+ | CD161- |
| FKBP1A       | 1.24E-09   | 0.77901718      | 0.21  | 0.81  | 1.51E-05       | CD161+ | CD161- |
| CTLA4        | 1.44E-09   | 0.76248088      | 0.79  | 0.19  | 1.77E-05       | CD161+ | CD161- |
| CD7          | 2.04E-09   | 0.44805347      | 0.74  | 0.58  | 2.48E-05       | CD161+ | CD161- |
| ATP5G3       | 3.59E-09   | 0.57611025      | 0.49  | 0.76  | 4.37E-05       | CD161+ | CD161- |
| PSMB9        | 3.69E-09   | 0.61325375      | 0.53  | 0.71  | 4.49E-05       | CD161+ | CD161- |
| CCL3         | 4.24E-09   | 1.18623866      | 0.24  | 0.67  | 5.17E-05       | CD161+ | CD161- |
| LAGE3        | 5.73E-09   | 0.76803555      | 0.41  | 0.48  | 6.98E-05       | CD161+ | CD161- |
| YWHA8        | 1.01E-08   | 0.57154425      | 0.92  | 0.28  | 0.00012272     | CD161+ | CD161- |
| PSMB10       | 1.29E-08   | 0.76264701      | 0.26  | 0.81  | 0.00015627     | CD161+ | CD161- |
| PTPRCAP      | 2.12E-08   | 0.43431704      | 0.91  | 0.76  | 0.00016753     | CD161+ | CD161- |
| SENG3        | 2.18E-08   | 0.81020498      | 0.47  | 0.205 | 0.00020976     | CD161+ | CD161- |
| CD27         | 3.44E-08   | 0.14318206      | 0.25  | 0.67  | 0.00018047     | CD161+ | CD161- |
| HLA-DQA1     | 4.26E-08   | 0.55861633      | 0.29  | 0.1   | 0.00051103     | CD161+ | CD161- |
| LGALS3       | 7.34E-08   | 0.84869719      | 0.48  | 0.167 | 0.00080389     | CD161+ | CD161- |
| ATP5C2       | 7.46E-08   | 0.48072702      | 0.52  | 0.76  | 0.00090908     | CD161+ | CD161- |
| CTSD         | 7.55E-08   | 0.72110802      | 0.28  | 0.76  | 0.00091979     | CD161+ | CD161- |
| FAM83        | 1.23E-07   | 0.30903556      | 0.39  | 0.37  | 0.00149405     | CD161+ | CD161- |
| RHOA         | 1.23E-07   | 0.50647674      | 0.58  | 0.19  | 0.00149429     | CD161+ | CD161- |
| SEI2         | 1.74E-07   | 0.27063837      | 0.21  | 0.29  | 0.00241593     | CD161+ | CD161- |
| BLKTS1       | 1.94E-07   | 0.45102088      | 0.34  | 0.24  | 0.00270384     | CD161+ | CD161- |
| HLA-DQA1     | 2.31E-07   | 0.55696291      | 0.26  | 0.67  | 0.00281276     | CD161+ | CD161- |
| SRFB         | 2.80E-07   | 0.79204976      | 0.31  | 0.33  | 0.00341143     | CD161+ | CD161- |
| LSP1         | 3.08E-07   | 0.47570481      | 0.44  | 0.2   | 0.00375198     | CD161+ | CD161- |
| PPP1B        | 3.34E-07   | 0.44440404      | 0.63  | 0.33  | 0.00406102     | CD161+ | CD161- |
| IL2          | 3.42E-07   | 0.53125751      | 0.93  | 0.71  | 0.00410764     | CD161+ | CD161- |
| CD3G         | 4.46E-07   | 0.77702642      | 0.285 | 0.95  | 0.01145019     | CD161+ | CD161- |
| COG8B        | 9.75E-07   | 0.40662047      | 0.58  | 0.33  | 0.01197073     | CD161+ | CD161- |
| NDKFA1       | 1.05E-06   | 0.43492335      | 0.99  | 0.24  | 0.01270221     | CD161+ | CD161- |
| RAC2         | 1.27E-06   | 0.40283047      | 0.79  | 0.467 | 0.01547209     | CD161+ | CD161- |
| CD3D         | 1.29E-06   | 0.50910923      | 0.85  | 0.65  | 0.01574023     | CD161+ | CD161- |
| LSM7         | 1.39E-06   | 0.43470165      | 0.84  | 0.71  | 0.01696421     | CD161+ | CD161- |
| ARPC1B       | 1.51E-06   | 0.56517645      | 0.45  | 0.29  | 0.01871204     | CD161+ | CD161- |
| LENC1E2      | 1.55E-06   | 0.37031702      | 0.44  | 0.205 | 0.01883209     | CD161+ | CD161- |
| TPH1         | 1.82E-06   | 0.54272333      | 0.53  | 0.343 | 0.02220856     | CD161+ | CD161- |
| KLHL1        | 1.98E-06   | 0.54801659      | 0.262 | 0.95  | 0.02409031     | CD161+ | CD161- |
| HEPPL1       | 2.52E-06   | 0.49064546      | 0.256 | 0.81  | 0.02644081     | CD161+ | CD161- |
| CLCA1        | 3.14E-06   | 0.32560374      | 0.85  | 0.71  | 0.02818567     | CD161+ | CD161- |
| RABAC1       | 4.72E-06   | 0.38052924      | 0.74  | 0.24  | 0.02751613     | CD161+ | CD161- |
| CAFZB        | 4.91E-06   | 0.49487487      | 0.48  | 0.24  | 0.02979611     | CD161+ | CD161- |
| BTTL2        | 6.03E-06   | 0.40263845      | 0.303 | 0.14  | 0.03758457     | CD161+ | CD161- |
| CASP4        | 6.96E-06   | 0.5548912       | 0.274 | 0.1   | 0.04091472     | CD161+ | CD161- |
| CLEC2B       | 6.75E-06   | 0.34771899      | 0.549 | 0.295 | 0.04304144     | CD161+ | CD161- |
| LY8E         | 1.08E-05   | 0.44848192      | 0.415 | 0.21  | 0.03970971     | CD161+ | CD161- |
| LY8E         | 1.25E-05   | 0.46275086      | 0.314 | 0.129 | 0.15272092     | CD161+ | CD161- |
| CTC4         | 1.37E-05   | 0.54842092      | 0.403 | 0.162 | 0.16696814     | CD161+ | CD161- |
| TYER2        | 1.46E-05   | 0.35489797      | 0.794 | 0.448 | 0.17809836     | CD161+ | CD161- |
| UBQL3        | 1.55E-05   | 0.44561254      | 0.256 | 0.09  | 0.18879058     | CD161+ | CD161- |
| UCP2         | 1.65E-05   | 0.39647228      | 0.18  | 0.129 | 0.20450109     | CD161+ | CD161- |
| Chp9         | 1.93E-05   | 0.42390985      | 0.37  | 0.157 | 0.2343184      | CD161+ | CD161- |
| ALXDA        | 2.78E-05   | 0.47486796      | 0.565 | 0.37  | 0.33431084     | CD161+ | CD161- |
| RPN2         | 2.85E-05   | 0.52125395      | 0.852 | 0.705 | 0.34752485     | CD161+ | CD161- |
| TRAF3IP1     | 2.95E-05   | 0.37173434      | 0.303 | 0.124 | 0.35824251     | CD161+ | CD161- |
| GSTP1        | 3.43E-05   | 0.53610723      | 0.54  | 0.29  | 0.41132331     | CD161+ | CD161- |
| NDFA12       | 3.88E-05   | 0.43046917      | 0.271 | 0.11  | 0.47249123     | CD161+ | CD161- |
| NDHIF1       | 4.40E-05   | 0.44934334      | 0.3   | 0.133 | 0.54062264     | CD161+ | CD161- |
| PSMB1        | 4.96E-05   | 0.44051817      | 0.144 | 0.143 | 0.59449429     | CD161+ | CD161- |
| LDHB         | 4.95E-05   | 0.33580261      | 0.386 | 0.181 | 0.60317792     | CD161+ | CD161- |
| ADP-SCN3     | 5.31E-05   | 0.57904441      | 0.278 | 0.124 | 0.64709786     | CD161+ | CD161- |
| CXCR6        | 5.56E-05   | 0.40383487      | 0.39  | 0.2   | 0.68025019     | CD161+ | CD161- |
| ARPC3        | 6.14E-05   | 0.28436053      | 0.671 | 0.433 | 0.74710531     | CD161+ | CD161- |
| EIF2F        | 6.28E-05   | 0.43408848      | 0.255 | 0.148 | 0.76211393     | CD161+ | CD161- |
| PSME2        | 6.44E-05   | 0.35562055      | 0.581 | 0.362 | 0.78979701     | CD161+ | CD161- |
| OXDLA        | 7.29E-05   | 0.35592393      | 0.952 | 0.362 | 0.87746829     | CD161+ | CD161- |
| EVL          | 7.56E-05   | 0.40235179      | 0.433 | 0.224 | 0.92489719     | CD161+ | CD161- |
| RAC1         | 8.72E-05   | 0.37271679      | 0.336 | 0.157 | 1              | CD161+ | CD161- |
| PSME1        | 9.46E-05   | 0.27501764      | 0.707 | 0.381 | 1              | CD161+ | CD161- |
| CORO1A       | 0.00011581 | 0.39720444      | 0.458 | 0.207 | 1              | CD161+ | CD161- |
| IKST         | 0.00012155 | 0.26022962      | 0.78  | 0.381 | 1              | CD161+ | CD161- |
| CNSR2B       | 0.00013814 | 0.3977886       | 0.35  | 0.176 | 1              | CD161+ | CD161- |
| ATP5G2       | 0.00017264 | 0.24897778      | 0.812 | 0.681 | 1              | CD161+ | CD161- |
| SNO2         | 0.00017453 | 0.32577226      | 0.458 | 0.207 | 1              | CD161+ | CD161- |
| LCK          | 0.00017573 | 0.30817589      | 0.347 | 0.162 | 1              | CD161+ | CD161- |
| ATP5D        | 0.00018654 | 0.2590801       | 0.469 | 0.262 | 1              | CD161+ | CD161- |
| UBE2D        | 0.00018446 | 0.327811549     | 0.397 | 0.214 | 1              | CD161+ | CD161- |
| TM6SF2       | 0.00019059 | 0.55802124      | 0.422 | 0.233 | 1              | CD161+ | CD161- |
| CTSW         | 0.00019258 | 0.38804456      | 0.708 | 0.543 | 1              | CD161+ | CD161- |
| HIGD1A       | 0.00023572 | 0.35809474      | 0.634 | 0.381 | 1              | CD161+ | CD161- |
| WDKXON       | 0.00023609 | 0.31625526      | 0.397 | 0.214 | 1              | CD161+ | CD161- |
| DYNLL1       | 0.00023657 | 0.39734948      | 0.253 | 0.114 | 1              | CD161+ | CD161- |
| CPL1         | 0.00043029 | 0.32671673      | 0.765 | 0.571 | 1              | CD161+ | CD161- |
| IL3RG        | 0.00044707 | 0.37759752      | 0.581 | 0.362 | 1              | CD161+ | CD161- |
| ACTG1        | 0.00048462 | 0.37781325      | 0.758 | 0.595 | 1              | CD161+ | CD161- |
| HDAC9        | 0.00049595 | 0.11717594      | 0.269 | 0.143 | 1              | CD161+ | CD161- |
| PAP2         | 0.00046654 | 0.27071327      | 0.271 | 0.124 | 1              | CD161+ | CD161- |
| ARPC2        | 0.00047088 | 0.29724806      | 0.599 | 0.405 | 1              | CD161+ | CD161- |
| NEK2B        | 0.00047401 | 0.25617967      | 0.44  | 0.124 | 1              | CD161+ | CD161- |
| PKK1         | 0.00057779 | 0.24913392      | 0.422 | 0.243 | 1              | CD161+ | CD161- |
| CARL1B       | 0.00059808 | 0.212140449     | 0.274 | 0.129 | 1              | CD161+ | CD161- |
| ENO1         | 0.00062363 | 0.37167482      | 0.285 | 0.143 | 1              | CD161+ | CD161- |
| KLF1         | 0.00062375 | 0.32492952      | 0.43  | 0.248 | 1              | CD161+ | CD161- |
| IT3          | 0.00062003 | 0.49822028      | 0.3   | 0.152 | 1              | CD161+ | CD161- |
| APBT         | 0.00073215 | 0.30752978      | 0.354 | 0.19  | 1              | CD161+ | CD161- |
| TM6SF1       | 0.00071146 | 0.29080333      | 0.521 | 0.229 | 1              | CD161+ | CD161- |
| CAL1         | 0.00070621 | 0.26077119      | 0.262 | 0.138 | 1              | CD161+ | CD161- |
| SRP14        | 0.00070709 | 0.25823358      | 0.639 | 0.443 | 1              | CD161+ | CD161- |
| CNMF6        | 0.00082626 | 0.32833556      | 0.422 | 0.257 | 1              | CD161+ | CD161- |
| PSMB2        | 0.00081421 | 0.29990909      | 0.271 | 0.129 | 1              | CD161+ | CD161- |
| ADP-SCN6     | 0.00080078 | 0.42421352      | 0.527 | 0.337 | 1              | CD161+ | CD161- |
| RPL21        | 0.00101461 | 0.24052154      | 0.448 | 0.207 | 1              | CD161+ | CD161- |
| TOMAB1       | 0.00110367 | 0.24149584      | 0.415 | 0.238 | 1              | CD161+ | CD161- |
| MIR59        | 0.00121977 | 0.30771479      | 0.231 | 0.176 | 1              | CD161+ | CD161- |
| CAC2         | 0.00124541 | 0.256302157     | 0.329 | 0.167 | 1              | CD161+ | CD161- |
| CNKAP2       | 0.00127026 | 0.34090272      | 0.264 | 0.133 | 1              | CD161+ | CD161- |
| ARF5         | 0.00123232 | 0.30448694      | 0.264 | 0.133 | 1              | CD161+ | CD161- |
| USMG5        | 0.00110498 | 0.24291947      | 0.538 | 0.352 | 1              | CD161+ | CD161- |
| DYNLT1       | 0.00170578 | 0.24645576      | 0.253 | 0.124 | 1              | CD161+ | CD161- |
| ATP5C1       | 0.00192524 | 0.44864843      | 0.26  | 0.133 | 1              | CD161+ | CD161- |
| SU3I         | 0.001948   |                 |       |       |                |        |        |

Supplementary Table 6. The correlation of CD8+PD-1+CD161- or CD8+PD-1+CD161+ T Cell distribution with clinical outcome

RFS

| Month | T region        |             |                 |              |                 |       | N region        |             |                 |              |                 |  |
|-------|-----------------|-------------|-----------------|--------------|-----------------|-------|-----------------|-------------|-----------------|--------------|-----------------|--|
|       | CD8+PD-1+CD161- |             | CD8+PD-1+CD161+ |              | CD8+PD-1+CD161+ |       | CD8+PD-1+CD161- |             | CD8+PD-1+CD161+ |              | CD8+PD-1+CD161+ |  |
|       | T cells high    | T cells low | Month           | T cells high | T cells low     | Month | T cells high    | T cells low | Month           | T cells high | T cells low     |  |
| 20.2  | 1               |             | 37              | 1            |                 | 84.7  | 0               |             | 34.2            | 1            |                 |  |
| 2.8   | 1               |             | 20.2            | 1            |                 | 9.7   | 1               |             | 85.2            | 0            |                 |  |
| 1.9   | 1               |             | 81.9            | 0            |                 | 34.2  | 1               |             | 37              | 1            |                 |  |
| 76.6  | 0               |             | 10.8            | 1            |                 | 85.6  | 0               |             | 12.7            | 1            |                 |  |
| 2.7   | 1               |             | 89.3            | 0            |                 | 1.4   | 1               |             | 87.6            | 0            |                 |  |
| 81.9  | 0               |             | 1.9             | 1            |                 | 5.8   | 1               |             | 75.7            | 0            |                 |  |
| 1.4   | 1               |             | 2.8             | 1            |                 | 87.6  | 0               |             | 9.7             | 1            |                 |  |
| 1.7   | 1               |             | 1.2             | 1            |                 | 85.2  | 0               |             | 36.2            | 1            |                 |  |
| 1.2   | 1               |             | 80.8            | 0            |                 | 2     | 1               |             | 85.6            | 0            |                 |  |
| 14    | 1               |             | 1.4             | 1            |                 | 76.6  | 0               |             | 84.7            | 0            |                 |  |
| 34.2  | 1               |             | 1.7             | 1            |                 | 70.9  | 1               |             | 36.3            | 1            |                 |  |
| 10.8  | 1               |             | 95.7            | 0            |                 | 1.7   | 1               |             | 10.8            | 1            |                 |  |
| 70.9  | 0               |             | 34.2            | 1            |                 | 27.3  | 1               |             | 84.2            | 0            |                 |  |
| 80.8  | 0               |             | 65.1            | 0            |                 | 10.8  | 1               |             | 88.5            | 0            |                 |  |
| 5.2   |                 | 1           | 77.1            |              | 0               | 75.7  |                 | 0           | 27.3            |              | 1               |  |
| 65.1  |                 | 0           | 5.2             |              | 1               | 36.2  |                 | 1           | 1.4             |              | 1               |  |
| 77    |                 | 0           | 97.5            |              | 0               | 1.9   |                 | 1           | 2               |              | 1               |  |
| 9.7   |                 | 1           | 36.3            |              | 1               | 36.3  |                 | 1           | 14              |              | 1               |  |
| 97.5  |                 | 0           | 14              |              | 1               | 55.3  |                 | 1           | 76.6            |              | 0               |  |
| 2.2   |                 | 1           | 2.7             |              | 1               | 14    |                 | 1           | 70.9            |              | 1               |  |
| 19.1  |                 | 1           | 75.7            |              | 0               | 84.2  |                 | 0           | 1.9             |              | 1               |  |
| 37    |                 | 1           | 76.6            |              | 0               | 77    |                 | 0           | 55.3            |              | 1               |  |
| 89.3  |                 | 0           | 70.9            |              | 1               | 1.7   |                 | 1           | 1.8             |              | 1               |  |
| 95.7  |                 | 0           | 77              |              | 0               | 12.7  |                 | 1           | 5.8             |              | 1               |  |
| 77.1  |                 | 0           | 9.7             |              | 1               | 2.2   |                 | 1           | 1.7             |              | 1               |  |
| 36.3  |                 | 1           | 2.2             |              | 1               | 37    |                 | 1           | 2.2             |              | 1               |  |
| 75.7  |                 | 0           | 19.1            |              | 1               | 88.5  |                 | 0           | 77              |              | 0               |  |
| 77.9  |                 | 0           | 77.9            |              | 0               | 1.8   |                 | 1           | 1.7             |              | 1               |  |

OS

| Month | T region        |             |                 |              |                 |       | N region        |             |                 |              |                 |  |
|-------|-----------------|-------------|-----------------|--------------|-----------------|-------|-----------------|-------------|-----------------|--------------|-----------------|--|
|       | CD8+PD-1+CD161- |             | CD8+PD-1+CD161+ |              | CD8+PD-1+CD161+ |       | CD8+PD-1+CD161- |             | CD8+PD-1+CD161+ |              | CD8+PD-1+CD161+ |  |
|       | T cells high    | T cells low | Month           | T cells high | T cells low     | Month | T cells high    | T cells low | Month           | T cells high | T cells low     |  |
| 33.4  | 1               |             | 49.5            | 1            |                 | 84.7  | 0               |             | 54.5            | 1            |                 |  |
| 60.8  | 1               |             | 33.4            | 1            |                 | 12.7  | 1               |             | 85.2            | 0            |                 |  |
| 3     | 1               |             | 81.9            | 0            |                 | 54.5  | 1               |             | 49.5            | 1            |                 |  |
| 76.6  | 0               |             | 39.5            | 1            |                 | 85.6  | 0               |             | 88.8            | 0            |                 |  |
| 5.9   | 1               |             | 89.3            | 0            |                 | 4.1   | 1               |             | 87.6            | 0            |                 |  |
| 81.9  | 0               |             | 3               | 1            |                 | 11.9  | 1               |             | 75.7            | 0            |                 |  |
| 4.1   | 1               |             | 60.8            | 1            |                 | 87.6  | 0               |             | 12.7            | 1            |                 |  |
| 14.7  | 1               |             | 2.3             | 1            |                 | 85.2  | 0               |             | 40.2            | 1            |                 |  |
| 2.3   | 1               |             | 80.8            | 0            |                 | 94.3  | 0               |             | 85.6            | 0            |                 |  |
| 52.3  | 1               |             | 4.1             | 1            |                 | 76.6  | 0               |             | 84.7            | 0            |                 |  |
| 54.5  | 1               |             | 14.7            | 1            |                 | 80    | 0               |             | 48.4            | 1            |                 |  |
| 39.5  | 1               |             | 95.7            | 0            |                 | 14.7  | 1               |             | 39.5            | 1            |                 |  |
| 80    | 1               |             | 54.5            | 1            |                 | 30.3  | 1               |             | 84.2            | 0            |                 |  |
| 80.8  | 0               |             | 65.1            | 0            |                 | 39.5  | 1               |             | 88.5            | 0            |                 |  |
| 11.3  |                 | 1           | 77.1            |              | 0               | 75.7  |                 | 0           | 30.3            |              | 1               |  |
| 65.1  |                 | 0           | 11.3            |              | 1               | 40.2  |                 | 1           | 4.1             |              | 1               |  |
| 77    |                 | 0           | 97.5            |              | 0               | 2.9   |                 | 1           | 94.3            |              | 0               |  |
| 12.7  |                 | 1           | 48.4            |              | 1               | 48.4  |                 | 1           | 52.3            |              | 1               |  |
| 97.5  |                 | 0           | 52.3            |              | 1               | 59.6  |                 | 1           | 76.6            |              | 0               |  |
| 4.9   |                 | 1           | 5.9             |              | 1               | 52.3  |                 | 1           | 80              |              | 0               |  |
| 31.2  |                 | 1           | 75.7            |              | 0               | 84.2  |                 | 0           | 2.9             |              | 1               |  |
| 49.5  |                 | 1           | 76.6            |              | 0               | 77    |                 | 0           | 59.6            |              | 1               |  |
| 89.3  |                 | 0           | 80              |              | 0               | 12.9  |                 | 1           | 3.8             |              | 1               |  |
| 95.7  |                 | 0           | 77              |              | 0               | 88.8  |                 | 0           | 11.9            |              | 1               |  |
| 77.1  |                 | 0           | 12.7            |              | 1               | 4.9   |                 | 1           | 14.7            |              | 1               |  |
| 48.4  |                 | 1           | 4.9             |              | 1               | 49.5  |                 | 1           | 4.9             |              | 1               |  |
| 75.7  |                 | 0           | 31.2            |              | 1               | 88.5  |                 | 0           | 77              |              | 0               |  |
| 77.9  |                 | 0           | 77.9            |              | 0               | 3.8   |                 | 1           | 12.9            |              | 1               |  |



Supplementary Table 7: 37 Mean expression of each marker in blood

| Cluster | CD45 | CD45RA | CD45RO | CD45RB | CD4  | CD8a | CD7  | CD25 | CD114 | CD2  | CD45 | TIM 1 | CD127 | CD133 | CD104 | CD197 | CD28 | CD132 | CD60 | CD272 | CD161 | CD45RO | CD44 | CD27 | CD27a | CD45RA | CD3  | CD8  | CD27 | CD137 | HLA DR | CD223 | CD273 | CD26 |      |
|---------|------|--------|--------|--------|------|------|------|------|-------|------|------|-------|-------|-------|-------|-------|------|-------|------|-------|-------|--------|------|------|-------|--------|------|------|------|-------|--------|-------|-------|------|------|
| T0      | 0.68 | 0.35   | 0.46   | 0.56   | 0.12 | 0.60 | 0.08 | 0.01 | 0.05  | 0.02 | 0.44 | 0.07  | 0.02  | 0.00  | 0.00  | 0.34  | 0.38 | 0.13  | 0.16 | 0.00  | 0.07  | 0.01   | 0.03 | 0.32 | 0.47  | 0.10   | 0.73 | 0.74 | 0.10 | 0.01  | 0.09   | 0.01  | 0.00  | 0.13 | 0.04 |
| T02     | 0.80 | 0.69   | 0.70   | 0.22   | 0.29 | 0.28 | 0.25 | 0.17 | 0.04  | 0.01 | 0.31 | 0.41  | 0.05  | 0.02  | 0.01  | 0.09  | 0.55 | 0.24  | 0.45 | 0.00  | 0.16  | 0.08   | 0.30 | 0.71 | 0.13  | 0.04   | 0.65 | 0.56 | 0.67 | 0.24  | 0.05   | 0.77  | 0.02  | 0.12 | 0.16 |
| T03     | 0.74 | 0.65   | 0.74   | 0.51   | 0.40 | 0.03 | 0.88 | 0.45 | 0.00  | 0.02 | 0.84 | 0.26  | 0.03  | 0.07  | 0.00  | 0.76  | 0.23 | 0.06  | 0.17 | 0.25  | 0.02  | 0.05   | 0.51 | 0.47 | 0.06  | 0.09   | 0.22 | 0.76 | 0.37 | 0.83  | 0.22   | 0.15  | 0.00  | 0.07 | 0.10 |
| T04     | 0.77 | 0.54   | 0.70   | 0.41   | 0.52 | 0.01 | 0.12 | 0.63 | 0.02  | 0.02 | 0.77 | 0.23  | 0.04  | 0.03  | 0.00  | 0.75  | 0.28 | 0.29  | 0.21 | 0.00  | 0.10  | 0.38   | 0.35 | 0.48 | 0.32  | 0.10   | 0.42 | 0.88 | 0.36 | 0.12  | 0.02   | 0.09  | 0.00  | 0.20 | 0.15 |
| T05     | 0.75 | 0.65   | 0.74   | 0.03   | 0.43 | 0.43 | 0.21 | 0.31 | 0.01  | 0.02 | 0.89 | 0.29  | 0.06  | 0.11  | 0.00  | 0.76  | 0.28 | 0.14  | 0.28 | 0.00  | 0.04  | 0.14   | 0.09 | 0.50 | 0.01  | 0.16   | 0.23 | 0.76 | 0.39 | 0.82  | 0.21   | 0.11  | 0.00  | 0.16 | 0.09 |
| T06     | 0.76 | 0.44   | 0.52   | 0.59   | 0.15 | 0.03 | 0.85 | 0.71 | 0.01  | 0.02 | 0.73 | 0.06  | 0.02  | 0.00  | 0.00  | 0.65  | 0.71 | 0.38  | 0.15 | 0.21  | 0.14  | 0.01   | 0.03 | 0.66 | 0.60  | 0.13   | 0.99 | 0.82 | 0.15 | 0.04  | 0.00   | 0.00  | 0.24  | 0.05 |      |
| T07     | 0.64 | 0.58   | 0.65   | 0.64   | 0.29 | 0.09 | 0.15 | 0.58 | 0.19  | 0.10 | 0.65 | 0.46  | 0.06  | 0.07  | 0.00  | 0.78  | 0.59 | 0.64  | 0.35 | 0.00  | 0.13  | 0.90   | 0.64 | 0.59 | 0.57  | 0.20   | 0.29 | 0.88 | 0.42 | 0.05  | 0.01   | 0.00  | 0.49  | 0.07 |      |
| T08     | 0.77 | 0.52   | 0.63   | 0.37   | 0.22 | 0.07 | 0.85 | 0.48 | 0.02  | 0.03 | 0.71 | 0.34  | 0.06  | 0.03  | 0.00  | 0.74  | 0.62 | 0.59  | 0.25 | 0.00  | 0.06  | 0.01   | 0.10 | 0.50 | 0.70  | 0.28   | 0.97 | 0.85 | 0.39 | 0.12  | 0.01   | 0.22  | 0.00  | 0.23 | 0.03 |
| T09     | 0.75 | 0.59   | 0.73   | 0.31   | 0.41 | 0.62 | 0.62 | 0.63 | 0.01  | 0.02 | 0.76 | 0.26  | 0.02  | 0.00  | 0.00  | 0.77  | 0.25 | 0.07  | 0.19 | 0.19  | 0.04  | 0.28   | 0.04 | 0.46 | 0.10  | 0.04   | 0.80 | 0.77 | 0.35 | 0.32  | 0.03   | 0.14  | 0.00  | 0.06 | 0.15 |
| T10     | 0.77 | 0.46   | 0.61   | 0.62   | 0.23 | 0.06 | 0.13 | 0.58 | 0.16  | 0.06 | 0.31 | 0.38  | 0.04  | 0.04  | 0.00  | 0.73  | 0.53 | 0.28  | 0.00 | 0.10  | 0.07  | 0.51   | 0.50 | 0.50 | 0.20  | 0.21   | 0.81 | 0.33 | 0.04 | 0.01  | 0.04   | 0.00  | 0.38  | 0.06 |      |
| T11     | 0.76 | 0.34   | 0.58   | 0.60   | 0.33 | 0.63 | 0.13 | 0.50 | 0.52  | 0.09 | 0.78 | 0.59  | 0.04  | 0.03  | 0.00  | 0.82  | 0.45 | 0.57  | 0.31 | 0.00  | 0.03  | 0.03   | 0.63 | 0.52 | 0.54  | 0.41   | 0.17 | 0.82 | 0.34 | 0.04  | 0.01   | 0.22  | 0.00  | 0.03 | 0.05 |
| T12     | 0.79 | 0.40   | 0.52   | 0.62   | 0.16 | 0.66 | 0.13 | 0.71 | 0.06  | 0.02 | 0.71 | 0.11  | 0.03  | 0.01  | 0.00  | 0.69  | 0.71 | 0.51  | 0.28 | 0.00  | 0.18  | 0.01   | 0.08 | 0.52 | 0.61  | 0.23   | 0.86 | 0.90 | 0.43 | 0.06  | 0.01   | 0.02  | 0.00  | 0.31 | 0.06 |
| T13     | 0.78 | 0.48   | 0.67   | 0.42   | 0.65 | 0.03 | 0.76 | 0.43 | 0.01  | 0.03 | 0.83 | 0.30  | 0.04  | 0.05  | 0.00  | 0.73  | 0.30 | 0.51  | 0.22 | 0.12  | 0.07  | 0.65   | 0.47 | 0.50 | 0.30  | 0.11   | 0.32 | 0.81 | 0.41 | 0.05  | 0.01   | 0.05  | 0.01  | 0.42 | 0.07 |
| T14     | 0.73 | 0.64   | 0.73   | 0.44   | 0.36 | 0.03 | 0.87 | 0.50 | 0.01  | 0.02 | 0.61 | 0.24  | 0.03  | 0.02  | 0.00  | 0.77  | 0.24 | 0.05  | 0.10 | 0.25  | 0.03  | 0.04   | 0.09 | 0.47 | 0.05  | 0.07   | 0.74 | 0.76 | 0.39 | 0.01  | 0.18   | 0.14  | 0.00  | 0.08 | 0.11 |
| T15     | 0.73 | 0.59   | 0.71   | 0.15   | 0.31 | 0.01 | 0.11 | 0.61 | 0.01  | 0.02 | 0.71 | 0.27  | 0.03  | 0.01  | 0.00  | 0.75  | 0.23 | 0.06  | 0.18 | 0.00  | 0.03  | 0.24   | 0.06 | 0.44 | 0.06  | 0.05   | 0.97 | 0.78 | 0.27 | 0.55  | 0.08   | 0.16  | 0.01  | 0.05 | 0.11 |
| T16     | 0.75 | 0.52   | 0.74   | 0.30   | 0.29 | 0.02 | 0.20 | 0.50 | 0.03  | 0.03 | 0.72 | 0.19  | 0.05  | 0.00  | 0.00  | 0.81  | 0.30 | 0.07  | 0.25 | 0.01  | 0.08  | 0.44   | 0.15 | 0.49 | 0.04  | 0.11   | 0.67 | 0.87 | 0.44 | 0.70  | 0.19   | 0.12  | 0.01  | 0.24 | 0.62 |
| T17     | 0.75 | 0.51   | 0.66   | 0.62   | 0.41 | 0.65 | 0.15 | 0.32 | 0.13  | 0.06 | 0.86 | 0.42  | 0.06  | 0.00  | 0.00  | 0.75  | 0.39 | 0.50  | 0.28 | 0.00  | 0.06  | 0.13   | 0.59 | 0.51 | 0.16  | 0.16   | 0.17 | 0.77 | 0.33 | 0.06  | 0.01   | 0.10  | 0.00  | 0.35 | 0.07 |
| T18     | 0.77 | 0.57   | 0.68   | 0.51   | 0.44 | 0.04 | 0.85 | 0.57 | 0.04  | 0.02 | 0.84 | 0.35  | 0.03  | 0.08  | 0.00  | 0.75  | 0.34 | 0.40  | 0.17 | 0.22  | 0.05  | 0.03   | 0.45 | 0.49 | 0.38  | 0.11   | 0.52 | 0.76 | 0.36 | 0.11  | 0.01   | 0.13  | 0.00  | 0.22 | 0.06 |

Normalized intensity

Supplementary Table 8. The abundance of 18 Clusters in blood

| Clusters | P01   | P02   | P03   | P04   | P05   | P06   | P07   | P08  | P09   | P10   |
|----------|-------|-------|-------|-------|-------|-------|-------|------|-------|-------|
| T01      | 7.92  | 1.83  | 2.25  | 5.25  | 3     | 1.92  | 3.58  | 3.08 | 1.92  | 1.92  |
| T02      | 0.25  | 0.08  | 0.17  | 0     | 0.08  | 0.17  | 0.33  | 0.08 | 0.42  | 0.17  |
| T03      | 1     | 6.67  | 1.42  | 1     | 7.75  | 5.08  | 13.58 | 1.5  | 8.58  | 2.58  |
| T04      | 7.17  | 2.5   | 16.17 | 6.33  | 9.42  | 1.25  | 3.5   | 7.33 | 11.92 | 3.67  |
| T05      | 0.58  | 2.5   | 7.75  | 0.5   | 2.42  | 10.17 | 2.42  | 5.25 | 5.92  | 3     |
| T06      | 11.33 | 3.5   | 6.25  | 4.83  | 1.58  | 1.17  | 6.25  | 5.67 | 4.67  | 3.5   |
| T07      | 4.42  | 3.5   | 2.17  | 8.17  | 3.58  | 3.17  | 4.17  | 2.75 | 4.33  | 6.25  |
| T08      | 0.25  | 0.17  | 0.08  | 0.17  | 0.17  | 0.25  | 0.5   | 0.5  | 0.25  | 0.25  |
| T09      | 3.67  | 10.75 | 7     | 3     | 3.25  | 14.17 | 3.67  | 2.83 | 2.83  | 7.5   |
| T10      | 10.67 | 11.67 | 6.33  | 18.17 | 8.58  | 11.5  | 11.67 | 11   | 12.83 | 16.67 |
| T11      | 0.75  | 1.5   | 1.42  | 2     | 1.42  | 1.83  | 2.67  | 0.33 | 2.17  | 2.92  |
| T12      | 17.42 | 5.58  | 9.67  | 11.92 | 10.92 | 3.58  | 6.33  | 5.17 | 4.75  | 4.5   |
| T13      | 2.83  | 1.17  | 3.17  | 2     | 3.92  | 0.83  | 1     | 5.42 | 1.58  | 1.75  |
| T14      | 6     | 14.58 | 6.58  | 4.33  | 19.5  | 8.5   | 5.67  | 4.5  | 10.92 | 6.08  |
| T15      | 0.5   | 0.58  | 0.42  | 1.5   | 2.75  | 0.25  | 0.17  | 1.17 | 1.67  | 0.33  |
| T16      | 1.92  | 1.83  | 15.08 | 5.42  | 9.08  | 0.5   | 0.5   | 2.42 | 2.67  | 5.08  |
| T17      | 8.92  | 10.5  | 6.25  | 13.42 | 3.92  | 22.42 | 12.92 | 18.5 | 10.17 | 16.17 |
| T18      | 14.42 | 21.08 | 7.83  | 12    | 8.67  | 13.25 | 21.08 | 22.5 | 12.42 | 17.67 |

Cell percentage(%)
